# Supplementary material
Source: publisher figshare collection journal article supplement (https://tandf.figshare.com/articles/dataset/_/4008060)
Supplement: Supplementary file 1 [file 1]

**Table S1.** Detailed information about individuals from the seven populations of *Mesocrista* Pilato, 1987 used in different analyses in the study.

| Sample code | Number of individuals used in different analyses in the study |                                      |                                                |                |
|-------------|---------------------------------------------------------------|--------------------------------------|------------------------------------------------|----------------|
|             | Imaging of entire individuals in LM                           | Imaging of entire individuals in SEM | Imaging of bucco-pharyngeal apparatuses in SEM | DNA extraction |
| NO.007      | 5                                                             | 0                                    | 0                                              | 1              |
| NO.021      | 5                                                             | 0                                    | 1                                              | 2              |
| NO.023      | 4                                                             | 0                                    | 0                                              | 0              |
| NO.026      | 0                                                             | 0                                    | 1                                              | 0              |
| PL.001      | 7                                                             | 3                                    | 0                                              | 4              |
| PL.021      | 1                                                             | 0                                    | 4                                              | 2              |
| PL.059      | 17                                                            | 0                                    | 0                                              | 6              |

**Table S2.** The p-distance matrix for 28S sequences of *Mesocrista* spp. (all values in %).

| Sequence            | Mes.rev_haplotype 1 | Mes.rev_haplotype 2 | Mes.rev_haplotype 3 | Mes.rev_haplotype 4 |
|---------------------|---------------------|---------------------|---------------------|---------------------|
| Mes.rev_haplotype 1 |                     |                     |                     |                     |
| Mes.rev_haplotype 2 | 0.6                 |                     |                     |                     |
| Mes.rev_haplotype 3 | 0.1                 | 0.4                 |                     |                     |
| Mes.rev_haplotype 4 | 0.3                 | 0.6                 | 0.1                 |                     |
| Mes.spi             | 2.6                 | 2.6                 | 2.4                 | 2.3                 |

**Table S3.** The p-distance matrix for ITS-2 sequences of *Mesocrista* spp. (all values in %).

| Sequence            | Mes.rev_haplotype 1 | Mes.rev_haplotype 2 | Mes.rev_haplotype 3 |
|---------------------|---------------------|---------------------|---------------------|
| Mes.rev_haplotype 1 |                     |                     |                     |
| Mes.rev_haplotype 2 | 0.3                 |                     |                     |
| Mes.rev_haplotype 3 | 0.8                 | 0.5                 |                     |
| Mes.spi             | 13.5                | 13.2                | 12.9                |

**Table S4.** The p-distance matrix for COI sequences of *Mesocrista* spp. (all values in %).

| Sequence            | Mes.rev_haplotype 1 | Mes.rev_haplotype 2 | Mes.rev_haplotype 3 | Mes.rev_haplotype 4 |
|---------------------|---------------------|---------------------|---------------------|---------------------|
| Mes.rev_haplotype 1 |                     |                     |                     |                     |
| Mes.rev_haplotype 2 | 0.6                 |                     |                     |                     |
| Mes.rev_haplotype 3 | 0.1                 | 0.3                 |                     |                     |
| Mes.rev_haplotype 4 | 0.8                 | 0.8                 | 1.1                 |                     |
| Mes.spi             | 25.3                | 25.6                | 25.8                | 25.6                |
